# Supplementary material
Source: PubMed Central journal article supplement (PMC3732448)
Supplement: NIHMS497039-supplement-ESI.pdf [file NIHMS497039-supplement-ESI.pdf]

## *Supporting Information*

# **Quantitative Paper Spray Mass Spectrometry Analysis of Drugs of Abuse**

Yuan Su<sup>a</sup>, He Wang<sup>a</sup>, Jiangjiang Liu<sup>a</sup>, Pu Wei<sup>b</sup>, R. Graham, Cooks<sup>b,c</sup>, Ouyang Zheng<sup>\*a,c</sup>

<sup>a</sup>*Weldon School of Biomedical Engineering, Purdue University, 206 South Martin Jischke Drive, West Lafayette, IN 47907, USA.*

<sup>b</sup>*Department of Chemistry and Center for Analytical Instrumentation Development, Purdue University, 560 Oval Drive, West Lafayette, IN 47907, USA.*

<sup>c</sup>*Center for Analytical Instrumentation Development, Purdue University, 560 Oval Drive, West Lafayette, IN 47907, USA.*

*\*Corresponding author. Email: ouyang@purdue.edu;*

**Table S-1.** Tandem mass spectrometric parameters for paper spray.

| Drug                                                                                  | Precursor ion<br>( <i>m/z</i> ) | Product ion<br>( <i>m/z</i> )                                              | Collision energy<br>(V) | Tube lens |
|---------------------------------------------------------------------------------------|---------------------------------|----------------------------------------------------------------------------|-------------------------|-----------|
| Morphine<br>[C <sub>17</sub> H <sub>19</sub> NO <sub>3</sub> +H] <sup>+</sup>         | 286.1                           | 201.0<br>-(C <sub>4</sub> H <sub>7</sub> NO) <sup>1</sup>                  | 25                      | 102       |
| Morphine-d3                                                                           | 289.1                           | 201.0<br>-(C <sub>4</sub> H <sub>4</sub> D <sub>3</sub> NO)                | 25                      | 102       |
| Benzyloecgonine<br>[C <sub>16</sub> H <sub>19</sub> NO <sub>4</sub> +H] <sup>+</sup>  | 290.0                           | 168.0<br>-(C <sub>7</sub> H <sub>6</sub> O <sub>2</sub> ) <sup>2</sup>     | 18                      | 146       |
| Benzyloecgonine-d3                                                                    | 293.0                           | 171.0<br>-(C <sub>7</sub> H <sub>6</sub> O <sub>2</sub> )                  | 18                      | 146       |
| Cocaine<br>[C <sub>17</sub> H <sub>21</sub> NO <sub>4</sub> +H] <sup>+</sup>          | 304.0                           | 182.0<br>-(C <sub>7</sub> H <sub>6</sub> O <sub>2</sub> ) <sup>3</sup>     | 20                      | 78        |
| Cocaine-d3                                                                            | 307.0                           | 185.0<br>-(C <sub>7</sub> H <sub>6</sub> O <sub>2</sub> )                  | 20                      | 78        |
| 6-acetylmorphine<br>[C <sub>19</sub> H <sub>21</sub> NO <sub>4</sub> +H] <sup>+</sup> | 328.3                           | 164.9<br>-(C <sub>6</sub> H <sub>13</sub> NO <sub>4</sub> ) <sup>4</sup>   | 26                      | 117       |
| 6-acetylmorphine-d3                                                                   | 331.3                           | 164.9<br>-(C <sub>6</sub> H <sub>10</sub> D <sub>3</sub> NO <sub>4</sub> ) | 26                      | 117       |
| Methamphetamine<br>[C <sub>10</sub> H <sub>15</sub> N+H] <sup>+</sup>                 | 150.1                           | 91.1<br>-(C <sub>3</sub> H <sub>9</sub> N) <sup>5</sup>                    | 24                      | 69        |
| Methamphetamine-d8                                                                    | 158.1                           | 93.1<br>-(C <sub>3</sub> H <sub>3</sub> D <sub>6</sub> N)                  | 24                      | 69        |
| Oxycodone<br>[C <sub>18</sub> H <sub>21</sub> NO <sub>4</sub> +H] <sup>+</sup>        | 316.1                           | 298.0<br>-(H <sub>2</sub> O) <sup>6</sup>                                  | 20                      | 80        |
|                                                                                       |                                 | 241.0<br>-(C <sub>3</sub> H <sub>7</sub> O <sub>2</sub> )                  | 26                      | 80        |
| Oxycodone-d6                                                                          | 322.1                           | 304.8<br>-(H <sub>2</sub> O)                                               | 20                      | 80        |
|                                                                                       |                                 | 247.0<br>-(C <sub>3</sub> H <sub>7</sub> O <sub>2</sub> )                  | 26                      | 80        |
| Buprenorphine<br>[C <sub>29</sub> H <sub>41</sub> NO <sub>4</sub> +H] <sup>+</sup>    | 468.2                           | 396.1<br>-(C <sub>4</sub> H <sub>8</sub> O) <sup>7</sup>                   | 36                      | 64        |
| Buprenorphine-d4                                                                      | 472.2                           | 400.1<br>-(C <sub>4</sub> H <sub>8</sub> O)                                | 36                      | 64        |

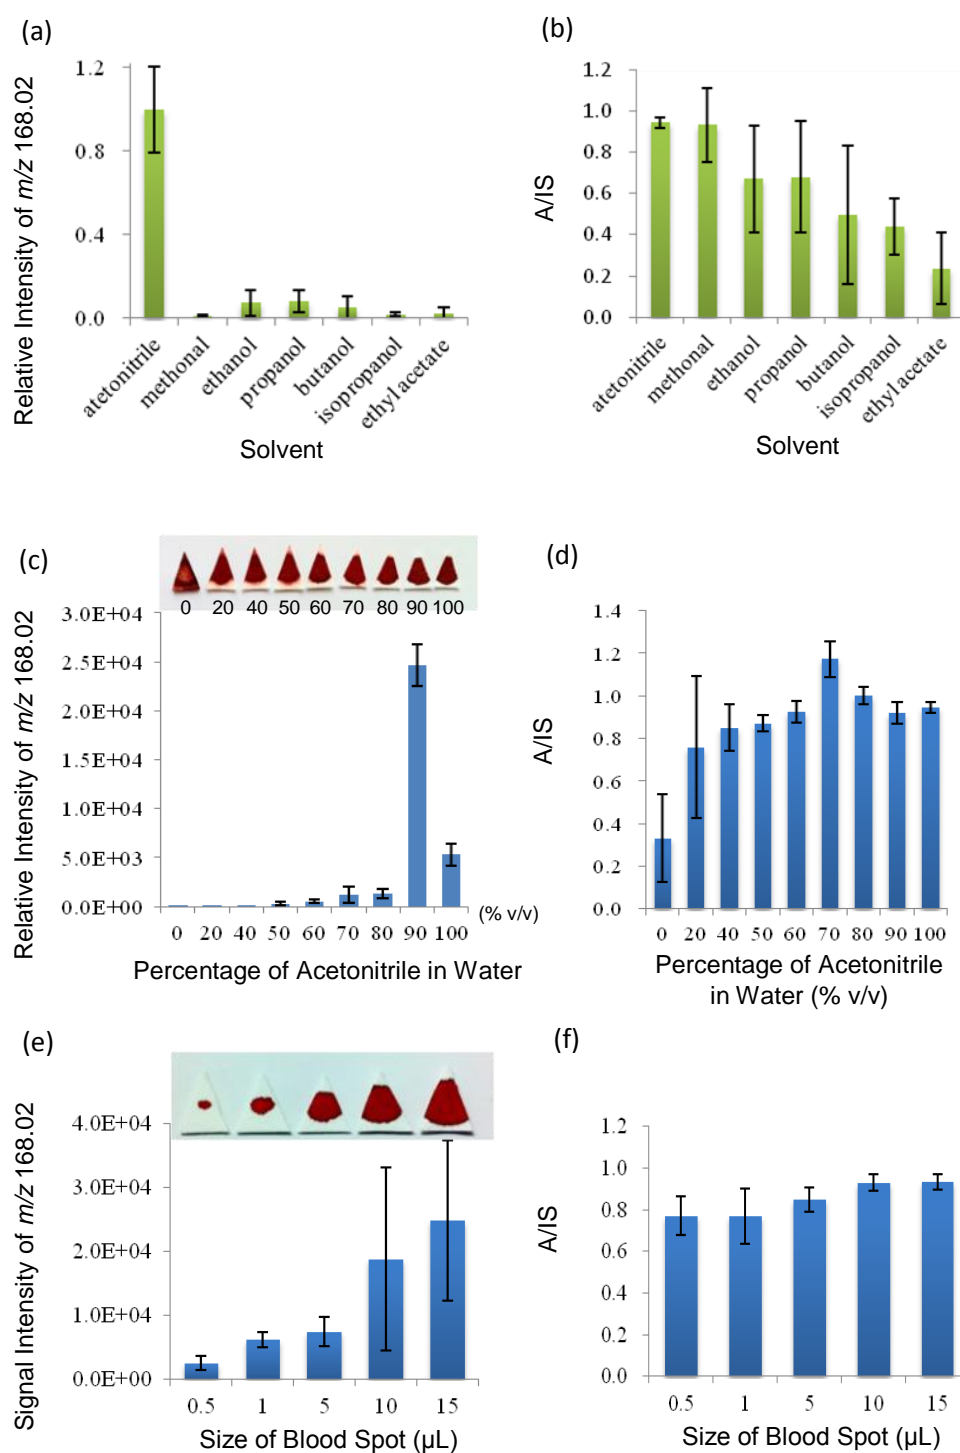

**Fig. S1.** Optimization of experimental conditions for quantitative paper spray mass spectrometry. Effect of spray solvent on (a) the signal intensity and (b) the ratio of analyte to internal standard (A/IS) of benzyolecgonine  $[(M+H)^+]$ ,  $m/z$  290.0, product ion,  $m/z$  168.0]. Effect of acetonitrile percentage in water on (c) the signal intensity and (d) the ratio of analyte to internal standard (A/IS) of benzyolecgonine. Effect of blood size on (e) the signal intensity and (f) the ratio of analyte to internal standard (A/IS) of benzyolecgonine.

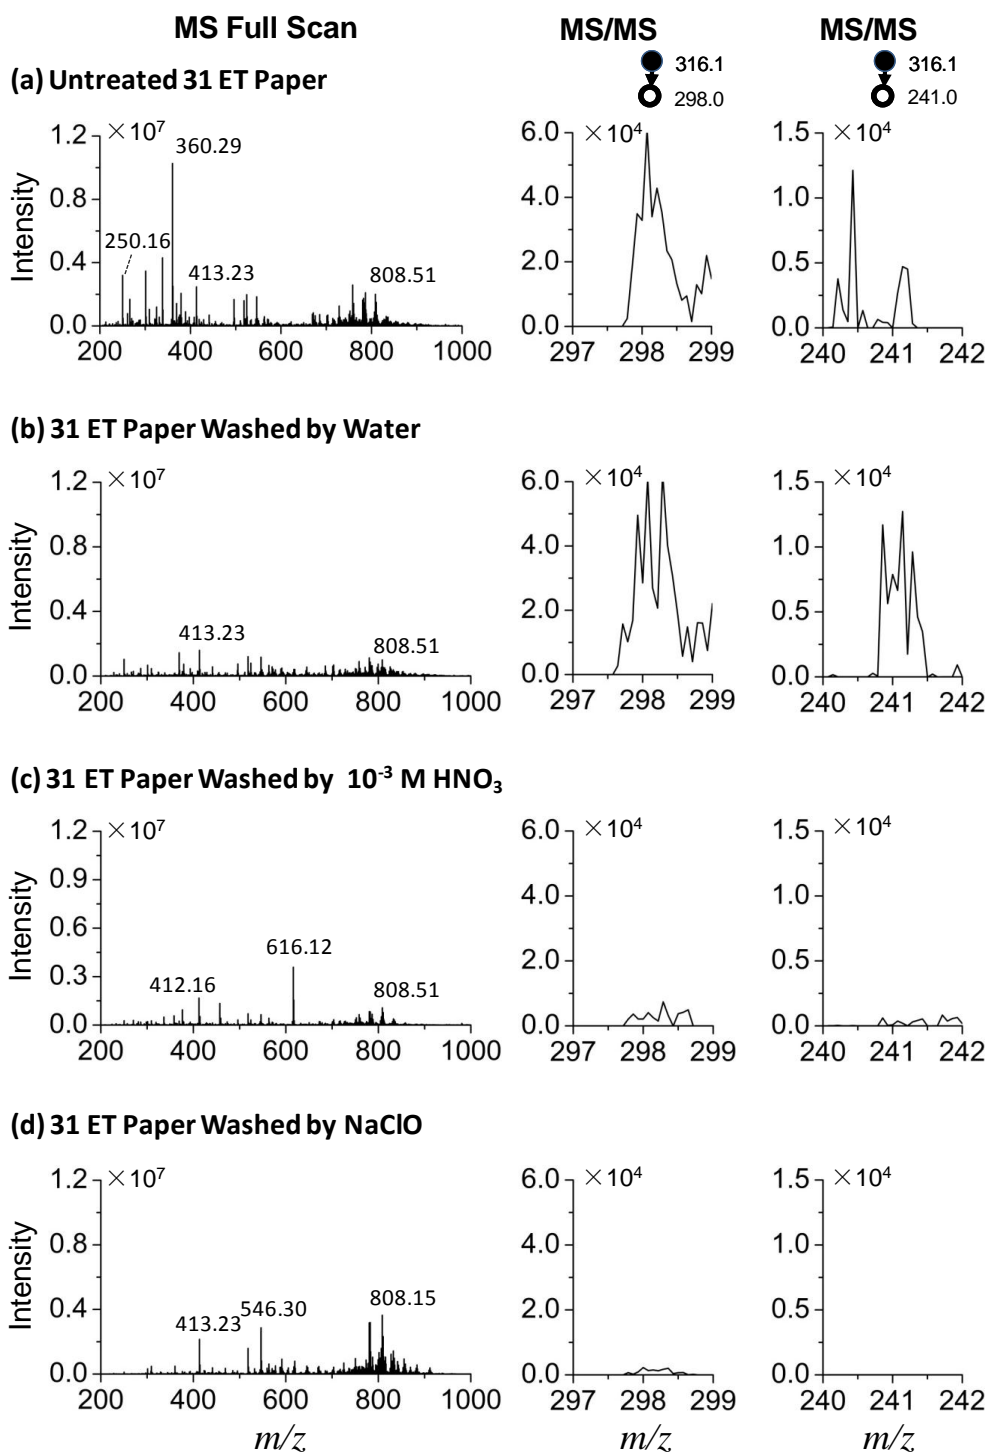

**Fig. S2.** MS spectra (mass range:  $m/z$  200-1000) by Orbitrap and MS/MS spectra (parent ion:  $m/z$  316.1, mass range: 297.0-299.0 and 240.0-242.0) by TSQ for blank dried blood spot with different treatment of paper: (a) untreated 31 ET paper, (b) 31 ET paper washed by water, (c) 31 ET paper washed by  $10^{-3}$  M  $\text{HNO}_3$  aqueous solution and (d) ET paper washed by  $\text{NaClO}$  aqueous solution ( $\text{Cl}\% = 1.5$  g/L,  $\text{pH}=12$ ). Paper spray solvent: 90% acetonitrile: 10% water solution; solvent volume: 25  $\mu\text{L}$ ; Voltage: 3.5 kV.

## References

---

- <sup>1</sup> C. Poeknapo, U. Fisinger, M. H. Zenk and J. Schmidt, *Phytochemistry*, 2004, **65**, 1413–1420.
- <sup>2</sup> W. F. Smyth, *Electrophoresis*, 2005, **26**, 1334–1357.
- <sup>3</sup> O. Curcuruto, F. Guidugli and P. Traldi, *Rapid Commun. Mass Spectrom.* 1992, **6**, 436-437.
- <sup>4</sup> K. Raith and R. Neubert, *J. Am. Soc. Mass Spectrom.*, 2003, **14**, 1262–1269.
- <sup>5</sup> W. E. Steiner, B. H. Clowers, K. Fuhrer, M. Gonin, L. M. Matz, W. F. Siems, A. J. Schultz and H. H. Hill, *Rapid Commun. Mass Spectrom.* 2001, **15**, 2221-2226.
- <sup>6</sup> K. Pennanen, T. Kotiaho, K. Huikko and R. Kostianen, *J. Mass Spectrom.*, 2001, **36**, 791–797.
- <sup>7</sup> D. Favretto, G. Frison, S. Vogliardi and S. D. Ferrara, *Rapid Commun. Mass Spectrom.* 2006, **20**, 1257-1265.
